# 1 **Natural selection drives population divergence for local adaptation in a wheat pathogen**

2 Danilo Pereira<sup>1</sup>, Daniel Croll<sup>2</sup>, Patrick C. Brunner<sup>1\*</sup> and Bruce A. McDonald<sup>1\*</sup>

3 <sup>1</sup>Plant Pathology Group, ETH Zurich, Universitatstrasse 2, 8092 Zurich, Switzerland.

4 <sup>2</sup>Laboratory of Evolutionary Genetics, Institute of Biology, University of Neuchâtel,  
5 Neuchâtel, Switzerland.

6

7 \*These authors contributed equally to this work

8 Corresponding author: Danilo Pereira: [danilo.dossantos@usys.ethz.ch](mailto:danilo.dossantos@usys.ethz.ch)

9

## 10 **Abstract**

11 Evolution favors the emergence of locally-adapted optimum phenotypes that are  
12 likely to differ across a wide array of environmental conditions. The emergence of  
13 favorable adaptive characteristics is accelerated in agricultural pathogens due to the  
14 unique properties of agro-ecosystems. We performed a  $Q_{ST} - F_{ST}$  comparison using 164  
15 strains of *Parastagonospora nodorum* sampled from eight global field populations to  
16 disentangle the predominant evolutionary forces driving population divergence in a  
17 wheat pathogen. We used digital image analysis to obtain quantitative measurements of  
18 growth rate and melanization at different temperatures and under different fungicide  
19 concentrations in a common garden experiment.  $F_{ST}$  measures were based on complete  
20 genome sequences obtained for all 164 isolates. Our analyses indicated that all measured  
21 traits were under selection. Growth rates at 18°C and 24°C were under stabilizing  
22 selection ( $Q_{ST} < F_{ST}$ ), while diversifying selection ( $Q_{ST} > F_{ST}$ ) was the predominant  
23 evolutionary force affecting growth under fungicide and high temperature stress.

24 Stabilizing selection ( $Q_{ST} < F_{ST}$ ) was the predominant force affecting melanization across  
25 the different environments. Melanin production increased at 30°C but was negatively  
26 correlated with higher growth rates, consistent with a trade-off under heat stress. Our  
27 results demonstrate that global populations of *P. nodorum* possess significant  
28 evolutionary potential to adapt to changing local conditions, including warmer  
29 temperatures and applications of fungicides.

30

31 **Keywords:** population genetics, pathogen evolution, thermal adaptation, fungicide  
32 resistance, diversifying selection, *Parastagonospora nodorum*

33

## 34 1. INTRODUCTION

35 Evolution by means of natural selection operates on individual phenotypes and is  
36 enabled by the diversity found in genes encoding quantitative traits within populations.  
37 Across a wide array of environmental conditions, evolution towards a local optimum  
38 phenotype results from the interplay among evolutionary forces such as natural selection  
39 and gene flow and stochastic events like founder events and population extinctions  
40 (Merilä and Crnokrak, 2001; Leinonen et al., 2008). Evolutionary processes affecting local  
41 adaptation of pathogen populations may act differently in agro-ecosystems compared to  
42 natural environments. For example, the high planting densities found in agricultural fields  
43 allow more efficient pathogen transmission and the genetic uniformity of agricultural  
44 hosts enable the development of large pathogen populations while imposing strong  
45 directional selection that accelerates the emergence of host specialization (Stukenbrock  
46 and McDonald, 2008; McDonald and Stukenbrock, 2016; Corredor-Moreno and Saunders,

47 2019). While particular agro-ecosystems (e.g. the one used for wheat production) tend to  
48 be highly similar on a global spatial scale, local pathogen populations can encounter  
49 significant differences in the deployment of resistance genes, pesticide exposure and  
50 annual fluctuations in temperature over a growing season (Laine, 2008; Stukenbrock and  
51 McDonald, 2008; Elderd and Reilly, 2014). Hence, we expect that even globally  
52 distributed pathogens can evolve different traits in different local populations according  
53 to the predominating local evolutionary forces.

54 A better understanding of which evolutionary forces are driving local adaptation  
55 for a particular trait can be achieved using  $Q_{ST}$  -  $F_{ST}$  comparisons (Zhan et al., 2005;  
56 Leinonen et al., 2008; Leinonen et al., 2013; Stefansson et al., 2014; Yang et al., 2016).  $Q_{ST}$   
57 is an index of population differentiation based on the distribution of variation for a  
58 quantitative trait (Spitze, 1993).  $F_{ST}$  measures the degree of population divergence based  
59 on neutral genetic markers. Natural selection is inferred when population differentiation  
60 for quantitative traits is significantly different from that for neutral markers ( $Q_{ST} \neq F_{ST}$ ).  
61 Specifically, directional selection is inferred when the  $Q_{ST}$  is higher than the  $F_{ST}$ , and  
62 stabilizing selection is inferred when  $Q_{ST}$  is lower than the  $F_{ST}$  (Leinonen et al., 2013).  
63 When no differences are found between the two indexes, the inference is that the trait is  
64 neutral or that it is not possible to distinguish between the effects of genetic drift and  
65 natural selection in the populations being examined. Previous  $Q_{ST}$  -  $F_{ST}$  comparisons for  
66 plant pathogenic fungi were conducted using global field populations of the wheat  
67 pathogen *Zymoseptoria tritici* and the barley pathogen *Rhynchosporium commune*. In  
68 both cases, natural selection was inferred to be the main driver of local adaptation (Zhan  
69 et al., 2005; Stefansson et al., 2014), but directional selection predominated in *Z. tritici*,

70 while stabilizing selection was more important in *R. commune*. These differences highlight  
71 the necessity to consider the adaptive dynamics of each trait in a species-specific manner.

72 The fungal pathogen *Parastagonospora nodorum* causes stagonospora nodorum  
73 blotch (SNB), a major wheat disease found around the world (Quaedvlieg et al., 2013;  
74 Savary et al., 2019). Field populations of *P. nodorum* are reported to have low genetic  
75 differentiation among continents, elevated population size, high genetic diversity and  
76 exhibit frequent sexual recombination (Stukenbrock et al., 2006; Oliver et al., 2012). SNB  
77 control measures include fungicide applications and the deployment of wheat varieties  
78 that lack toxin sensitivity genes (Oliver et al., 2012; Ficke et al., 2017). Fungicides  
79 belonging to the sterol demethylation inhibitors group (DMIs) are commonly used in both  
80 agriculture and human medicine (Price et al., 2015). DMI-resistant strains of *P. nodorum*  
81 harboring point mutations in the gene encoding the targeted protein (CYP51) have been  
82 previously reported (Pereira et al., 2017). While the severity of SNB is influenced by  
83 environmental factors (e.g. SNB is most damaging in warm and moist conditions (Shaw et  
84 al., 2008; Zearfoss et al., 2011), the costs of managing SNB were estimated to be  
85 AUD\$108 m per year in Australia alone (Murray and Brennan, 2009). A better  
86 understanding of the evolutionary processes affecting local adaptation may provide  
87 insights into how to improve management strategies and potentially predict future  
88 evolutionary changes in *P. nodorum* populations.

89 Our aims in this study were to investigate the effects of natural selection and  
90 genetic drift on quantitative traits using eight populations of *P. nodorum* sampled from  
91 naturally infected farmer's fields around the world. We tested the hypothesis that local  
92 environmental conditions (e.g, high or low temperatures) and agricultural practices (e.g.,

93 fungicide applications) would impose directional selection on different traits of *P.*  
94 *nodorum*. First, we estimated the additive genetic variation for colony growth and  
95 melanization phenotypes following exposure to a range of different temperatures  
96 (providing a measure of thermal sensitivity) and fungicide concentrations (providing a  
97 measure of fungicide sensitivity). We accomplished this by measuring colony growth rates  
98 and melanization for 164 strains of *P. nodorum* using automated image analysis  
99 (Lendenmann et al., 2014, 2015). Next, we determined the degree of population genetic  
100 structure among the eight populations using nearly 50,000 neutral SNPs extracted from  
101 whole-genome sequences for all 164 strains. Finally, we estimated  $Q_{ST}$  values for each  
102 trait and compared these values to the  $F_{ST}$  index calculated across the eight populations.  
103 The  $Q_{ST} - F_{ST}$  comparisons allowed us to infer the predominant evolutionary forces driving  
104 quantitative trait divergence among these populations and allowed us to detect local  
105 adaptation in response to high temperatures and fungicide exposure.

106

## 107 **2. MATERIAL AND METHODS**

### 108 *2.1. Fungal populations and preparation of inoculum used for phenotyping*

109 *P. nodorum* strains were sampled between 1991 and 2005 from eight wheat fields  
110 growing in eight locations, including Australia, Iran, New York (USA), Oregon (USA), Texas  
111 (USA), South Africa and Switzerland (sites A and B). Details regarding sampling sites and  
112 population genetic structure based on SSR markers were described previously (McDonald  
113 et al., 2012; Stukenbrock et al., 2006). A total of 164 genetically distinct isolates were  
114 analyzed with an average of ~21 isolates per geographical field population (Table 1).

115 In earlier publications (McDonald et al., 2013, 2012; Pereira et al., 2017;  
116 Sommerhalder et al., 2006; Stukenbrock et al., 2006), the Switzerland 1999B population  
117 was indicated to originate from China. As a result of the genome sequence analyses  
118 reported in this paper, we believe that a transcription error led to mislabeling of the China  
119 2001 population, which we now believe was collected in 1999 from a Swiss field of wheat  
120 located near Bern, ~150 km away from where the Swiss 1999A population was collected.  
121 The transcription error may have resulted from the fact that the isolates from China  
122 labelled CHI01 (CHI for China, 01 for 2001) were mistakenly replaced by Swiss isolates  
123 labelled CH1 (CH1, Swiss collection 1, made in 1999). We discovered this error after our  
124 genome-wide analyses revealed that the Swiss 1999 population was virtually  
125 indistinguishable from the China 2001 population based on comparison of 49374 SNP  
126 markers distributed across the genome. While this mix-up is embarrassing, it does not  
127 compromise any of the analyses or interpretations reported in this manuscript.

128 Based on preliminary experiments, we used 5-mm-diameter plugs of mycelium as  
129 initial inoculum for all experiments. All isolates were retrieved from -80°C long-term  
130 storage on silica gel and transferred to Petri dishes containing Potato Dextrose Agar (PDA,  
131 4 g L<sup>-1</sup> potato starch, 20 g L<sup>-1</sup> dextrose, 15 g L<sup>-1</sup> agar and 50 mg L<sup>-1</sup> kanamycin). The PDA  
132 plates were grown for three days in the dark at a constant temperature of 24°C. 5-mm-  
133 diameter plugs of mycelium were cut from the edges of the growing colonies using a  
134 sterilized cork borer and placed onto the center of fresh PDA Petri dishes. These plates  
135 were grown in the dark at 24°C for seven days and then used as the inoculum sources for  
136 all experiments.

137

138 *2.2. Strain phenotyping*

139 All 164 isolates were exposed to the same seven environments, including low,  
140 optimum and high growth temperatures and four concentrations of an azole fungicide.  
141 The experiments were conducted in square Petri dishes (120 x 120 x 17 mm, Huberlab)  
142 containing PDA. Four 5-mm-diameter mycelium plugs of each strain were placed into the  
143 corners of a square plate with equidistant separation. Each treatment was replicated  
144 twice, generating eight colonies in total for each strain.

145 For the thermal response experiment, all isolates were grown in the dark on PDA  
146 at 18°C, 24°C and 30°C. Based on the outcomes of preliminary experiments using a subset  
147 of 16 of the strains (two from each field population), 18°C and 30°C were chosen to  
148 represent stressful temperatures while 24°C was chosen as an optimum temperature for  
149 growth. For the fungicide stress experiment, all isolates were grown at 24°C on PDA  
150 amended with propiconazole (Syngenta, Basel, Switzerland) at either 0, 0.1, 0.5 or 1 ppm.  
151 All inoculation procedures were performed on the same day for each of three separate  
152 batches of approximately 54 isolates. No significant differences could be attributed to  
153 batch effects.

154 Digital images for each environment were taken at 2, 4, 6 and 8 days after  
155 inoculation (DAI), a total of four time points. All camera settings and configurations, plate  
156 orientations, and lighting conditions were standardized as described previously  
157 (Lendenmann et al., 2014). After acquiring images, the plates were returned to their  
158 growth chambers and their positions in the growth chamber were re-randomized. The  
159 images were automatically analyzed using a modified version of a batch macro developed  
160 for ImageJ (Lendenmann et al., 2014). For the new macro, the conversion from pixels to

161 square millimeters was performed using a calibration image taken from 50 cm above the  
162 Petri dish. Colony detection was performed using the color threshold option, with the hue  
163 sliding scales varying between 22 and 255 (macro lines 70 and 71) (Supplementary 1).

164 Quantitative measurements were acquired from image analyses for each colony.  
165 Total colony area (mm<sup>2</sup>) and mean grey value per colony (GV, a proxy for total  
166 melanization on the 0-255 grey scale, where 0 is completely black and 255 is completely  
167 white) were measured from digital images taken through the Petri dish top for colony size  
168 measures and the Petri dish bottom for GV measures. We obtained a total of 8 raw data  
169 points per isolate at each time point in each environment. The raw measures of total  
170 colony area and GV were used to determine the following traits: (i) Radial growth rate  
171 was obtained by fitting the mean colony radii ( $\sqrt{total\ colony\ area/\pi}$ ) over the four time  
172 points using a general linear model, resulting in average  $r^2 > 0.9$  (Trinci 1971;  
173 Lendenmann et al. 2015); relative growth rates reflecting (ii) fungicide resistance and (iii)  
174 temperature sensitivity (TS) were determined for each isolate as the ratio between  
175 growth rates under different fungicide concentrations compared to the absence of  
176 fungicide, and growth rates at 18°C or 30°C compared to 24°C; (iv) melanization rate  
177 (MRate) was obtained by fitting the distribution of GVs over the four time points using a  
178 general linear model. A positive value for MRate indicates a decrease in melanization and  
179 a negative value for MRate indicates an increase in colony melanization over time. The (v)  
180 melanization response (MResp) trait was determined as the ratio between GV under a  
181 given fungicide dose and in the absence of fungicide; and as the ratio between GV at 18°C  
182 or 30°C against 24°C. When MResp > 1 it represents a decrease in melanization and  
183 MResp < 1 represents an increase in melanization after stress exposure relative to



184 optimum conditions. Variation among isolates for GV reached its maximum at 8 DAI, so  
185 MResp was calculated based on this time point.

186

### 187 *2.3. Strain genotyping*

188 Entire genome sequences were generated for all 164 strains. Strains were grown  
189 in Potato Dextrose Broth (PDB) and total DNA was extracted from lyophilized mycelium  
190 using DNeasy Plant Mini Kits (Qiagen) according to the manufacturer's instructions.  
191 Whole-genome sequencing was performed on an Illumina HiSeq 2500 platform, with  
192 paired-end reads of 150 bp. All the Illumina sequence data are available in the NCBI Short  
193 Read Archive (BioProject PRJNA606320).

194 The generated raw reads were trimmed for remaining Illumina adapters and read  
195 quality with Trimmomatic v0.36 (Bolger et al., 2014), using the following settings:  
196 illuminaclip = TruSeq3-PE.fa:2:30:10; leading = 10; trailing = 10; slidingwindow = 5:10;  
197 minlen = 50. Trimmed reads were aligned with the reference isolate SN2000 (Richards et  
198 al., 2017), which is assembled into chromosomes. The alignment was performed with the  
199 short-read aligner Bowtie 2 version 2.3.3 (Langmead and Salzberg, 2012), using the --very-  
200 sensitive-local option. Duplicated PCR reads were marked as duplicate using Picard tools  
201 version 2.17.2 (<http://broadinstitute.github.io/picard>).

202 Single nucleotide polymorphism (SNP) calling and variant filtration were  
203 performed using the Genome Analysis Toolkit (GATK) version 3.8-0 (McKenna et al.,  
204 2010). First, we used HaplotypeCaller in each isolate file individually, with the -  
205 emitRefConfidence GVCF and -ploidy 1 options. Then, joint variant calls were performed  
206 using GenotypeGVCFs with the flag -maxAltAlleles 2. Finally, SelectVariants and

207 VariantFiltration were used for hard filtering SNPs with the following cut-offs: QUAL <  
208 200; QD < 10.0; MQ < 20.0; -2 > BaseQRankSum > 2; -2 > MQRankSum > 2; -2 >  
209 ReadPosRankSum > 2; FS > 0.1.

210 We retained only bi-allelic sites and excluded sites with missing data using vcftools  
211 0.1.15 (Danecek et al., 2011). Using the function --indep-pairwise in plink v1.9 we pruned  
212 SNPs above a linkage disequilibrium threshold of 0.2 using a sliding window of 15 kb  
213 (Chang et al., 2015). From this unlinked SNP dataset, we selected only SNPs causing  
214 synonymous substitutions (on four-fold degenerated sites) to identify neutral SNP  
215 markers, using the software VCF2MK (<https://github.com/russcd/vcf2MK>). The final data  
216 set consisted of 49374 neutral and un-linked SNPs.

217

#### 218 *2.4. Data Analyses*

219 We applied a general linear model to determine whether there were significant  
220 effects for populations and isolates nested within populations on the trait values (package  
221 “lm” and function anova in R) (R Core Team, 2019). Among-population comparisons of  
222 mean growth rate and mean melanization in the different environments were based on  
223 Tukey’s honest significant difference test using R.

224 Within-population components of variance for each trait were determined using  
225 genetic variance and heritability (Willi et al., 2011; Stefansson et al., 2014; Pereira et al.,  
226 2016). The variance components were determined using a statistical procedure  
227 implemented in R software using the lme4 package (Bates et al., 2015). The variance  
228 derived from the isolates within each population was interpreted as genetic variance ( $V_G$ ),  
229 while variance among replicates of the same clone was interpreted as environmental

230 variance because replicates had the same genotype. Narrow-sense heritability ( $h^2$ ) was  
231 calculated as the ratio between  $V_G$  and total phenotypic variation within a population  
232 (Falconer and Mackay, 1996). Confidence intervals were estimated by applying a  
233 bootstrap with 999 re-samples.

234 Estimates of population divergence ( $F_{ST}$ ) were calculated using the 49374 retained  
235 SNPs with the R package hierfstat (Goudet, 2005). Overall and among-population values  
236 of  $F_{ST}$  as well as their confidence intervals were determined by bootstrapping with 999  
237 resamplings using hierfstat (Goudet, 2005). Nei's diversity was calculated using the  
238 popgenome R package (Pfeifer et al., 2014).

239 *P. nodorum* is a haploid organism, so dominance effects among alleles within loci  
240 can be ignored. If we assume a small or negligible epistatic effect within populations,  
241 genetic variance is equivalent to additive genetic variance for the determination of  
242 population divergence in quantitative traits ( $Q_{ST}$ ) (Whitlock, 2008). Under this scenario,  
243 the following formula can be used to calculate  $Q_{ST}$  as described by Zhan et al. (2005):

244 
$$Q_{ST} = \frac{\delta^2_{AP}}{\delta^2_{AP} + \delta^2_{WP}}$$

245 Where  $\delta^2_{AP}$  is the additive genetic variance attributed to among-population variation and  
246  $\delta^2_{WP}$  is the additive genetic variance attributed to within-population variation.

247 Correlation analyses among the 12 traits used in the  $Q_{ST}$ -  $F_{ST}$  analysis, between  
248 overall heritability and Nei's diversity, between MRate and fungicide resistance/growth  
249 rate and between MResp and growth rate and MRate were performed using a general  
250 linear model based on Pearson's coefficient in the R package RcmdrMisc (Fox, 2005), and  
251 visually represented using the R package ggplot2 (Wickham, 2009).

252           The thermal reaction norm of *P. nodorum* was modelled based on a second-order  
253 polynomial equation using individual measures of average growth rate for every isolate  
254 across the three tested temperatures. Another measure, the composite reaction norm,  
255 was calculated based on the slope of the reaction norm between 24°C and 18°C and  
256 between 24°C and 30°C. An average value was calculated from the two slopes and  
257 populations were compared based on these isolate mean values.

258

### 259 **3. RESULTS**

#### 260 *3.1. Colony growth rate and melanization show quantitative distributions and high* 261 *heritabilities*

262           Phenotypic variation for traits related to growth and melanization in *P. nodorum*  
263 was assessed after exposure to different temperatures and different concentrations of an  
264 azole fungicide for eight geographical field populations (Figure 1). As expected, the  
265 environment of 24°C without fungicide, hereafter referred to as the control environment,  
266 provided the fastest growth rate for most isolates. We found near-normal distributions  
267 for growth rate and melanization in the control environment and at 18°C and 30°C,  
268 consistent with quantitative inheritance of these traits (Figure 1). Growth rates at 0.1, 0.5  
269 and 1 ppm fungicide showed bimodal distributions (Figure 1). In general, all environments  
270 significantly affected the average trait values across all populations and across all isolates  
271 within populations ( $P \leq 0.0001$ , Table 2).

272           We observed high heritability ( $h^2$ ) values for growth rate and melanization in the  
273 different environments (Table 3).  $h^2$  ranged from a low of 0.58 for melanization in 0.5  
274 ppm propiconazole to a high of 0.95 for growth rate in the control environment and at

275 18°C and 30°C. Other traits with  $h^2$  higher than 0.9 were growth rates in 0.1 ppm, 0.5  
276 ppm, and 1 ppm propiconazole and melanization in the control environment, 18°C, 30°C  
277 and in 0.1 ppm propiconazole.

278

### 279 *3.2. Extreme temperatures and fungicide exposure reduced growth rates*

280 In the optimal control environment, the Australian population had a significantly  
281 lower growth rate (4.37 mm/day) than all other populations except South Africa ( $P \leq 0.05$ ,  
282 Table 4). Average growth rates slowed as propiconazole concentrations increased ( $P \leq$   
283 0.001). At 0.1 ppm, the Chinese and Swiss populations had the fastest growth rates (4.6  
284 and 4.3 mm/day, respectively;  $P \leq 0.05$ ; Table 4), while the populations from Australia,  
285 Oregon and South Africa had the slowest growth rates (2.6, 2.4 and 2.5 mm/day,  
286 respectively;  $P \leq 0.05$ ; Table 4). At the highest propiconazole concentrations (0.5 and 1  
287 ppm), the Chinese population grew the fastest (3.3 and 2.4 mm/day, respectively;  $P \leq$   
288 0.05; Table 4), followed by Switzerland (2.7 and 1.9 mm/day, respectively;  $P \leq 0.05$ ; Table  
289 4), with both populations showing significantly lower fungicide sensitivity than the other  
290 populations. No differences were detected among the other populations at these two  
291 concentrations.

292 Temperatures of 18°C and 30°C significantly reduced the average growth rates  
293 compared to the control temperature ( $P \leq 0.001$ ). At 18°C, the fastest growth rate was in  
294 the New York population, and the slowest was in Australia (4.4 and 3.6 mm/day,  
295 respectively,  $P \leq 0.05$ , Table 4). At 30°C, there were no significant differences among  
296 populations except for South Africa, which had the slowest growth rate (1.9 mm/day,  $P \leq$   
297 0.05, Table 4). Based on the TS calculations, the populations were overall more sensitive

298 to higher temperatures than to lower temperatures (Supplementary 2). For TS at the  
299 higher temperature, the populations from Australia and Texas were the least sensitive (TS  
300 values were closest to 1), whereas the population from South Africa was the most  
301 sensitive. For TS at the lower temperature, the populations from New York and Australia  
302 were the least affected. Altogether, 15 isolates had  $TS > 1$  at the lower temperature and  
303 no isolate had  $TS > 1$  at the higher temperature.

304 The thermal reaction norm of *P. nodorum*, which reflects the patterns of growth  
305 rate across the tested temperatures, showed a good fit to a second-order polynomial  
306 model (Supplementary 3). On average, this model accounted for 66% of the total  
307 variation for growth rates in *P. nodorum* ( $P \leq 0.001$ ). We did not find significant  
308 differences among populations using this composite reaction norm.

309

### 310 *3.3. Melanization varied according to environmental conditions*

311 We observed significant variation in melanization at the population level across  
312 varying temperatures and fungicide concentrations. In the control environment, the  
313 strains in the population from Oregon showed significantly lower melanization (i.e. higher  
314 GVs) than the populations from Australia, Switzerland (1999A and 1999B) and Texas ( $P \leq$   
315 0.05; Table 4). On average, more stressful temperatures and fungicide stress significantly  
316 affected melanization ( $P \leq 0.001$ ).

317 Melanization was significantly higher at 0.5 ppm than at 0 and 0.1 ppm of  
318 propiconazole across all populations ( $P \leq 0.001$ ), with mean GVs of 66, 82 and 77,  
319 respectively (Table 4). Average melanization across populations at 1 ppm (GV = 68) was  
320 not significantly different from melanization at 0.5 ppm (Table 4). Texas was the most

321 melanized population at 0.1 ppm, while Australia was the most melanized population at  
322 0.5 and 1 ppm propiconazole ( $P \leq 0.05$ , Table 4).

323         Across all populations we observed higher melanization at 30°C and lower  
324 melanization at 18°C (mean GVs of 61 and 90 respectively,  $P \leq 0.001$ , Table 4). At the  
325 highest temperature, Texas was the most melanized population and at the lowest  
326 temperature Australia showed the highest amount of melanization (mean GVs of 47 and  
327 81 respectively).

328

### 329 *3.4. Low population structure based on neutral genome-wide SNPs*

330         We inferred the population genetic structure among populations using markers  
331 distributed across the entire genome. We calculated the genome-wide  $F_{ST}$  using 49374  
332 unlinked SNPs (Supplementary 4). The overall  $F_{ST}$  across populations was 0.12 ( $P \leq$   
333 0.0001). The pairwise  $F_{ST}$  ranged from 0.24 between Australia and Iran to no  
334 differentiation between Switzerland A and B (Table 5). Iran was the population with the  
335 highest overall Nei's diversity (Table 4,  $P \leq 0.05$ , 0.13), consistent with previous studies  
336 placing the *P. nodorum* center of origin in the fertile crescent (McDonald et al., 2012).

337

### 338 *3.5. Natural selection was the predominant evolutionary force acting on P. nodorum* 339 *populations*

340         To disentangle the effects of natural selection and genetic drift on quantitative  
341 traits in populations of *P. nodorum*, we compared the  $Q_{ST}$  index for each trait to the  $F_{ST}$   
342 index (Figure 2). The  $Q_{ST}$  values for melanization were consistently lower than  $F_{ST}$  across  
343 all environments (Figure 2,  $P \leq 0.0001$ ), suggesting that melanization is under stabilizing

344 selection. Growth rates in all environments, except for the control environment and 18°C,  
345 had significantly higher  $Q_{ST}$  than  $F_{ST}$  (Figure 2,  $P \leq 0.0001$ ), suggesting that selection  
346 operates to favor local adaptation for these traits.

347

### 348 *3.6. Trait correlations*

349 We next sought to investigate the relationship between pairs of traits. The  
350 correlation analysis revealed significant positive correlations among growth rates and  
351 among GVs (Figure 3,  $P \leq 0.0001$ ), but no significant correlations were found between  
352 growth rates and GVs for any treatment. Overall growth rates amongst the three  
353 concentrations of fungicide were all significantly correlated, indicating that less sensitive  
354 isolates maintained higher growth rates across all concentrations of propiconazole.  
355 Growth rate in the control environment was correlated with growth rate at 18°C but not  
356 with growth rate at 30°C. For melanization, we found positive correlations for GV at 0.1  
357 ppm, 0.5 ppm, 1 ppm, 30°C, 18°C and the control environment. For instance, GV at 30°C  
358 was moderately correlated with GVs at 0.1 and 0.5 ppm propiconazole ( $R = 0.40$  and  $0.35$   
359 respectively,  $P \leq 0.0001$ ) suggesting that melanin accumulates similarly under these  
360 conditions.

361 Fungicide resistance and growth rates at different temperatures were significantly  
362 correlated with melanization rates (Figure 4). We found significant correlations between  
363 fungicide resistance and MRate at 0.5 and 1 ppm ( $p \leq 0.001$ , Figure 4A). At the higher  
364 concentrations, isolates with more negative MRate displayed an overall increase in levels  
365 of fungicide resistance. At 30°C, growth rate and MRate were significantly correlated



366 (Figure 4B), suggesting that isolates with higher MRate were growing faster. Analogous  
367 patterns were observed for fungicide resistance and MResp (Supplementary 5A).

368 No significant correlations were found between TS and mean annual temperature  
369 or annual temperature variation (Supplementary 2).

370

#### 371 **4. DISCUSSION**

372 We inferred the patterns of selection operating on different quantitative traits  
373 using 164 isolates representing global field populations of the wheat pathogen *P.*

374 *nodorum*. Our study supports the hypothesis that natural selection is affecting growth  
375 rates and melanization at different temperatures and fungicide concentrations, likely  
376 reflecting the process of local adaptation.

377 Temperature has an especially large impact on the physiology of ectothermic  
378 organisms like fungi because their internal temperature directly reflects the external  
379 thermal environment (Angilletta et al., 2006; Knies and Kingsolver, 2010). In general,  
380 phenotypic plasticity and genetic differentiation are considered the main mechanisms  
381 underlying the evolution of thermal adaptation (Chevin et al., 2010; Cooper et al., 2012;  
382 Tonsor et al., 2013; Yampolsky et al., 2013). On average, we found that plasticity made  
383 only a small contribution (<5%) to overall phenotype variation. The field populations from  
384 Australia and South Africa had both the slowest overall growth rates and the lowest levels  
385 of genetic diversity. We hypothesize that the slow growth rates in these populations  
386 reflects a lower evolutionary potential due to a founder effect (Carson 1961; Templeton  
387 et al. 2001), as also seen for Australian populations of *Z. tritici* and *R. commune* (Zhan and  
388 McDonald, 2011; Stefansson et al., 2014). The Australian and South African populations of

389 *P. nodorum* likely originated on infected seeds when Europeans introduced wheat into  
390 these regions during the last 500 years, providing a restricted gene pool (Stukenbrock et  
391 al., 2006). Subsequent gene flow that could increase local genetic diversity during the  
392 modern era may have been prevented by global trading patterns (Australia is a major  
393 wheat exporter and South Africa imports relatively little wheat) coupled with effective  
394 quarantine measures that limited the introduction of additional infected wheat seeds or  
395 grains (Oliver et al., 2012).

396         The  $Q_{ST} - F_{ST}$  analyses indicated that growth at 18°C and 24°C were under  
397 stabilizing selection ( $Q_{ST} < F_{ST}$ ), while diversifying selection ( $Q_{ST} > F_{ST}$ ) was the  
398 predominant evolutionary force affecting growth at 30°C. These three temperatures  
399 represent the range of temperatures that are likely to be encountered by many *P.*  
400 *nodorum* populations during the wheat cropping season. It was postulated that field  
401 environments experiencing a wide fluctuation in temperatures would favor isolates that  
402 can grow more quickly and consequently colonize the host faster when conditions  
403 become conducive for disease development (Stefansson et al., 2013; Yang et al., 2016).  
404 However, because the pathogen depends on the host for reproduction, the pathogen's  
405 overall fitness may be negatively affected if the host life span is reduced due to excessive  
406 host damage caused by pathogen growth that is too rapid (Boots et al., 2004). This trade-  
407 off between pathogen virulence and pathogen reproduction may stabilize rates of host  
408 colonization in environments where optimum temperatures for infection and colonization  
409 are more constant and frequent, offsetting the selective pressure that favors faster  
410 growers (Alizon et al., 2009). The temperatures of 18°C and 24°C used in our experiment  
411 appear closest to the optimum temperatures for *P. nodorum* growth and development,

412 consistent with the finding of stabilizing selection, which favors isolates with growth rates  
413 closer to the population mean. The significantly higher population differentiation at 30°C  
414 is consistent with a process of diversifying selection for local adaptation. Over time, this  
415 selective process would be expected to evolve *P. nodorum* populations that are locally  
416 adapted to higher temperatures (Hayden et al., 2014; Yang et al., 2016). Given current  
417 patterns of global trade, strains of *P. nodorum* that are adapted to higher temperatures in  
418 wheat-exporting countries like Australia could be unintentionally introduced into regions  
419 such as Switzerland where local populations are maladapted to high temperatures. The  
420 long-distance movement of new strains of the wheat yellow rust fungus showing novel  
421 temperature adaptations caused extensive damage (Hovmoller et al., 2008). Thus *P.*  
422 *nodorum* joins the ranks of plant pathogens that are likely to pose an increasing risk to  
423 global food security in a warming world (Hovmoller et al., 2008; Milus et al., 2009; Fisher  
424 et al., 2012; Stefansson et al., 2013).

425         Directional selection ( $Q_{ST} > F_{ST}$ ) was associated with growth rates at all tested  
426 fungicide concentrations, indicating that natural selection is the main contributor to  
427 population differentiation for fungicide sensitivity. We extracted and analyzed the *CYP51*  
428 gene from the genome sequences of all 164 isolates used in this  $Q_{ST}$  -  $F_{ST}$  analysis, and  
429 confirmed the occurrence of previously reported *CYP51* mutations in isolates exhibiting  
430 the highest fungicide resistance (Pereira et al., 2017). The observed mutations, found only  
431 in the populations from Switzerland, are likely responsible for most of the differences in  
432 growth rate at different fungicide concentrations among populations.

433         Evidence that directional selection shapes local adaptation for fungicide resistance  
434 was also found in the wheat pathogen *Zymoseptoria tritici* (Zhan et al., 2005), while in

435 *Rhynchosporium commune* and *Phytophthora infestans* it was found to be under  
436 stabilizing selection (Stefansson et al., 2014; Qin et al., 2016). In *Z. tritici* the emergence of  
437 *CYP51* mutations in the pathogen populations was proposed to occur locally and then  
438 spread via gene flow across Europe or, as shown more recently, across Tasmania (Brunner  
439 et al., 2008; McDonald et al., 2018). *P. nodorum* and *Z. tritici* frequently coinfect wheat  
440 plants in the field (Gilbert and Woods, 2001; Blixt et al., 2010; Oliver et al., 2012). Though  
441 the majority of fungicides applied to wheat in Europe target *Z. tritici* (Fones and Gurr,  
442 2015), we hypothesize that these treatments indirectly selected for fungicide resistance  
443 in populations of *P. nodorum* (Knorr et al., 2019). The findings of *CYP51* mutations  
444 associated with azole resistance, high heritability, and evidence for diversifying selection  
445 favoring local adaptation suggest a significant risk for emergence and spread of azole  
446 resistance over larger geographical scales for *P. nodorum*.

447         Melanin is a secondary metabolite found broadly across eukaryotes that often  
448 displays complex phenotypic variation across an organism's life cycle (Butler and Day,  
449 1998; Chumley and Valent, 1990; Dadachova and Casadevall, 2008; Singaravelan et al.,  
450 2008; Sturm and Duffy, 2012). The ecological roles associated with fungal melanin vary  
451 widely among species (Butler and Day, 1998), but it is most often reported to be related  
452 to virulence, competition with other microbes, protection against UV light and toxic  
453 compounds, and tolerance of extreme temperatures (Nosanchuk and Casadevall, 2003;  
454 Dadachova et al., 2007; Hagiwara et al., 2017). Although melanin is thought to provide  
455 protection against cold and heat stress (Rehnstrom and Free, 1996; Paolo et al., 2006),  
456 there are exceptions (Wheeler and Bell, 1988), and information regarding its impact on  
457 fungal thermal tolerance remains scarce (Cordero and Casadevall, 2017). Melanin

458 production is energetically costly (Calvo et al., 2002), and may impose a fitness penalty if  
459 it reduces growth (Choi and Goodwin, 2011; Krishnan et al., 2018).

460 Quantitative measures of melanization in fungal colonies were previously used to  
461 infer possible contributions of melanin to variation in temperature and fungicide  
462 sensitivity in the fungi *Z. tritici* and *R. commune* (Lendenmann et al., 2014; Stefansson et  
463 al., 2014; Lendenmann et al., 2015; Zhu et al., 2018). In *P. nodorum* we found that  
464 stabilizing selection was the predominant evolutionary force shaping differences in  
465 melanization across all tested conditions. The low differentiation among populations for  
466 melanization suggests that selection operates against extreme phenotypes in *P. nodorum*  
467 (Sanjak et al., 2018). For the barley scald pathogen *R. commune*, melanization was also  
468 found to be under stabilizing selection (Stefansson et al., 2014). In *R. commune*, higher  
469 melanization was positively correlated with higher growth rates at 18°C and 22°C, as well  
470 as increased fungicide resistance (Zhu et al., 2018). Melanization was also correlated with  
471 faster growth rates at 15°C and reduced fungicide sensitivity in *Z. tritici* (Lendenmann et  
472 al., 2014, 2015).

473 In *P. nodorum* the GV for most isolates was lowest at 30°C, suggesting that  
474 melanin production increases under heat stress. We observed a negative correlation  
475 between MRate and growth rate at 30°C ( $P = 0.02$ ), with faster-growing colonies  
476 accumulating melanin at a slower rate, but there was no correlation between growth rate  
477 and MRate at 18 or 24°C. Altogether, these findings suggest a possible trade-off between  
478 melanization and growth rate under heat stress. The calculated values for both MRate  
479 and MResp suggest that the strains that were slowest to melanize had the greatest  
480 resistance to propiconazole, indicating that melanin production did not reduce azole

481 sensitivity. In a knockout study in *Z. tritici*, albino mutants lacking the melanin-related  
482 transcription factor *Zmr1* were exposed to two different fungicides, and had their growth  
483 compared to the wild type strain producing melanin (Krishnan et al., 2018). The fungicide  
484 bixafen (a succinate dehydrogenase inhibitor, SDHI) significantly reduced the growth of  
485 the albino mutants compared to the isogenic wild type strain, but there was no difference  
486 in the growth of the strains exposed to propiconazole (Krishnan et al., 2018). The  
487 protective effect of melanin against fungicides is attributed to its binding capacity, which  
488 reduces the fungicide availability (Bridelli et al., 2006; Paolo et al., 2006; Eisenman and  
489 Casadevall, 2012). Since melanin has a low binding affinity with azoles, the inefficient  
490 binding process may limit its overall contribution to azole resistance (Nosanchuk and  
491 Casadevall, 2006), consistent with our findings in *P. nodorum*.

492 Our findings illustrate how local environmental conditions can couple with  
493 different agricultural practices to shape the evolutionary trajectories of geographically  
494 distinct populations of a plant pathogen. The high heritability for traits related to  
495 fungicide and thermal sensitivity indicate the importance of genetic diversity in affecting  
496 the adaptative potential of *P. nodorum*. We found that directional selection favors  
497 genotypes with faster growth rates under fungicide and high-temperature stress. This  
498 suggests a significant risk for *P. nodorum* to develop fungicide resistance. Moreover,  
499 under the expected scenario of global warming, it is likely that SNB will easily adapt to  
500 susceptible wheat crops growing in warmer areas.

501

502 **Acknowledgements**

503 This study was financed in part by the “Coordenação de Aperfeiçoamento de Pessoal de  
504 Nível Superior - Brasil (CAPES)” - Finance Code 001. Marcello Zala provided technical  
505 assistance. The Genetic Diversity Center (GDC) – ETH Zurich and the Functional Genomics  
506 Center in Zurich provided sequencing facilities.

507

508

509

510

511

512

513

514

515

516

517

518

519

520

521

522

523

524

525

526 FIGURE 1 The distribution of growth rate (A) and grey value (B) for 164 isolates of  
527 *Parastagonospora nodorum* growing under different temperatures and fungicide  
528 concentrations. Each plot within a panel represents a different temperature or fungicide  
529 treatment as indicated in the aligned text. The grey value per colony is a proxy for total  
530 melanization on the 0-255 grey scale, where 0 is completely black (or highly melanized)  
531 and 255 is completely white (or not melanized).

532  
533 FIGURE 2 Comparisons of  $Q_{ST}$  -  $F_{ST}$  across 12 quantitative traits of *Parastagonospora*  
534 *nodorum*. Boxplots display the confidence intervals determined by bootstrapping with  
535 999 resamplings of  $Q_{ST}$  values. The red dashed lines show the overall  $F_{ST}$  distribution.  
536 Traits with a  $Q_{ST}$  distribution below that range are interpreted as being under stabilizing  
537 selection, while traits with  $Q_{ST}$  distribution above that range are interpreted as being  
538 under diversifying selection. The grey value per colony is a proxy for total melanization on  
539 the 0-255 grey scale, where 0 is completely black (or highly melanized) and 255 is  
540 completely white (or not melanized).

541  
542 FIGURE 3 Pairwise correlations among 12 quantitative traits of *Parastagonospora*  
543 *nodorum*. To make data comparable across populations, trait values of each trait-  
544 population combination were standardized to a mean of 0 and a standard deviation of 1,  
545 and then correlation analyses were performed based on isolate means. Significance levels  
546 were determined after Bonferroni correction for multiple comparisons. \* Significant at  $p$   
547  $< 0.0001$ ). The grey value per colony is a proxy for total melanization on the 0-255 grey  
548 scale, where 0 is completely black (or highly melanized) and 255 is completely white (or  
549 not melanized).

550  
551 FIGURE 4 Correlation analysis between melanization rate (calculated from the slope of a  
552 line fitted to GV over time) and (A) fungicide resistance (= growth rate in presence of  
553 fungicide / growth rate in absence of fungicide) and (B) growth rate of isolates under  
554 different temperatures. The dots represent individual isolates and colours the  
555 corresponding population of origin.



TABLE 1 Origin, location, year of collection and sample size (*N*) of *Parastagonospora nodorum* populations included in the  $Q_{ST}$ - $F_{ST}$  analysis.

| Origin               | Location          | Year      | <i>N</i> | Collector(s)                |
|----------------------|-------------------|-----------|----------|-----------------------------|
| <i>Oceania</i>       |                   |           |          |                             |
| Australia            | Narrogin          | 2001      | 22       | B.A. McDonald & R. Loughman |
| <i>Africa</i>        |                   |           |          |                             |
| South Africa         | Southwestern Cape | 1995      | 22       | P. Crous                    |
| <i>Europe</i>        |                   |           |          |                             |
| Switzerland A        | Winterthur        | 1999      | 22       | B.A. McDonald & V. Michel   |
| Switzerland B        | Bern              | 1999      | 22       | B.A. McDonald & V. Michel   |
| <i>Asia</i>          |                   |           |          |                             |
| Iran                 | Golestan Province | 2005/2010 | 16       | R. Sommerhalder & M. Razavi |
| <i>North America</i> |                   |           |          |                             |
| New York             | Ithaca            | 1991      | 21       | G. Bergstrom                |
| Oregon               | Hyslop            | 1993      | 17       | M. Schmidt                  |
| Texas                | Overton           | 1992      | 22       | B.A. McDonald & L. Nelson   |
| Totals               |                   | 1992-2010 | 164      |                             |

TABLE 2 General linear model analyses testing the effect of population and isolate (nested within population) on quantitative traits of *Parastagonospora nodorum*.

| Trait                      | Source                     | df  | MS      | F      | P       |
|----------------------------|----------------------------|-----|---------|--------|---------|
| Growth Rate 24°C (control) | Population                 | 7   | 4.22    | 77.08  | <0.0001 |
|                            | Isolates within population | 156 | 1.45    | 26.52  | <0.0001 |
|                            | Error                      | 164 | 0.05    | NA     | NA      |
| Growth Rate 18°C           | Population                 | 7   | 2.41    | 54.10  | <0.0001 |
|                            | Isolates within population | 156 | 1.17    | 26.27  | <0.0001 |
|                            | Error                      | 164 | 0.04    | NA     | NA      |
| Growth Rate 30°C           | Population                 | 7   | 2.40    | 76.40  | <0.0001 |
|                            | Isolates within population | 156 | 0.70    | 22.32  | <0.0001 |
|                            | Error                      | 164 | 0.03    | NA     | NA      |
| Growth Rate 0.1 ppm        | Population                 | 7   | 31.16   | 620.08 | <0.0001 |
|                            | Isolates within population | 156 | 0.71    | 14.04  | <0.0001 |
|                            | Error                      | 164 | 0.05    | NA     | NA      |
| Growth Rate 0.5 ppm        | Population                 | 7   | 40.11   | 640.44 | <0.0001 |
|                            | Isolates within population | 156 | 0.82    | 13.03  | <0.0001 |
|                            | Error                      | 164 | 0.06    | NA     | NA      |
| Growth Rate 1 ppm          | Population                 | 7   | 23.66   | 579.90 | <0.0001 |
|                            | Isolates within population | 156 | 0.53    | 12.88  | <0.0001 |
|                            | Error                      | 164 | 0.04    | NA     | NA      |
| Grey Value 24°C (control)  | Population                 | 7   | 6712.08 | 52.06  | <0.0001 |
|                            | Isolates within population | 156 | 1553.06 | 12.05  | <0.0001 |
|                            | Error                      | 164 | 128.92  | NA     | NA      |
| Grey Value 18°C            | Population                 | 7   | 3048.37 | 39.32  | <0.0001 |
|                            | Isolates within population | 156 | 1068.70 | 13.78  | <0.0001 |
|                            | Error                      | 164 | 77.53   | NA     | NA      |
| Grey Value 30°C            | Population                 | 7   | 5365.80 | 345.83 | <0.0001 |
|                            | Isolates within population | 156 | 1465.98 | 94.48  | <0.0001 |
|                            | Error                      | 164 | 15.52   | NA     | NA      |
| Grey Value 0.1 ppm         | Population                 | 7   | 5190.23 | 84.33  | <0.0001 |
|                            | Isolates within population | 156 | 1693.65 | 27.52  | <0.0001 |
|                            | Error                      | 164 | 61.55   | NA     | NA      |
| Grey Value 0.5 ppm         | Population                 | 7   | 4181.42 | 9.85   | <0.0001 |
|                            | Isolates within population | 156 | 1710.79 | 4.03   | <0.0001 |
|                            | Error                      | 164 | 424.37  | NA     | NA      |
| Grey Value 1 ppm           | Population                 | 7   | 4008.38 | 10.36  | <0.0001 |
|                            | Isolates within population | 156 | 1402.31 | 3.62   | <0.0001 |
|                            | Error                      | 164 | 386.93  | NA     | NA      |

TABLE 3 Heritability measures for 12 quantitative traits of *Parastagonospora nodorum*.

| Population                      | Growth Rate    | Growth Rate | Growth Rate | Growth Rate | Growth Rate | Growth Rate | Grey Value     | Grey Value | Grey Value | Grey Value | Grey Value | Grey Value |
|---------------------------------|----------------|-------------|-------------|-------------|-------------|-------------|----------------|------------|------------|------------|------------|------------|
|                                 | 24°C (control) | 18°C        | 30°C        | 0.1 ppm     | 0.5 ppm     | 1 ppm       | 24°C (control) | 18°C       | 30°C       | 0.1 ppm    | 0.5 ppm    | 1 ppm      |
| <b>Australia</b>                | 0.96           | 0.92        | 0.99        | 0.98        | 0.82        | 0.79        | 0.96           | 0.97       | 0.98       | 0.97       | 0.39       | 0.49       |
|                                 | 0.02           | 0.05        | 0.01        | 0.01        | 0.09        | 0.11        | 0.02           | 0.02       | 0.01       | 0.02       | 0.32       | 0.45       |
| <b>South Africa</b>             | 0.99           | 0.91        | 0.96        | 0.63        | 0.89        | 0.92        | 0.98           | 0.51       | 0.59       | 0.60       | 0.44       | 0.97       |
|                                 | 0.01           | 0.08        | 0.03        | 0.31        | 0.07        | 0.04        | 0.01           | 0.49       | 0.39       | 0.37       | 0.34       | 0.02       |
| <b>Switzerland A</b>            | 0.93           | 0.98        | 0.79        | 0.97        | 0.98        | 0.97        | 0.98           | 0.98       | 0.98       | 0.99       | 0.92       | 0.69       |
|                                 | 0.03           | 0.01        | 0.21        | 0.02        | 0.01        | 0.02        | 0.01           | 0.01       | 0.00       | 0.01       | 0.07       | 0.31       |
| <b>Switzerland B</b>            | 0.97           | 0.95        | 0.99        | 0.94        | 0.98        | 0.96        | 0.99           | 0.99       | 0.98       | 0.96       | 0.98       | 0.99       |
|                                 | 0.01           | 0.02        | 0.00        | 0.03        | 0.01        | 0.02        | 0.00           | 0.00       | 0.01       | 0.02       | 0.01       | 0.01       |
| <b>Iran</b>                     | 0.99           | 0.92        | 0.99        | 0.95        | 0.93        | 0.92        | 0.98           | 0.99       | 0.97       | 0.98       | 0.50       | 0.48       |
|                                 | 0.00           | 0.06        | 0.00        | 0.02        | 0.05        | 0.04        | 0.00           | 0.01       | 0.00       | 0.01       | 0.33       | 0.39       |
| <b>New York</b>                 | 0.98           | 0.98        | 0.96        | 0.99        | 0.77        | 0.86        | 0.66           | 0.99       | 0.98       | 0.97       | 0.52       | 0.66       |
|                                 | 0.01           | 0.01        | 0.04        | 0.00        | 0.19        | 0.08        | 0.35           | 0.00       | 0.00       | 0.01       | 0.44       | 0.32       |
| <b>Oregon</b>                   | 0.77           | 0.93        | 0.98        | 0.92        | 0.98        | 0.94        | 0.98           | 0.99       | 0.98       | 0.98       | 0.47       | 0.34       |
|                                 | 0.18           | 0.06        | 0.01        | 0.06        | 0.01        | 0.02        | 0.00           | 0.00       | 0.00       | 0.01       | 0.39       | 0.34       |
| <b>Texas</b>                    | 0.98           | 0.98        | 0.97        | 0.97        | 0.93        | 0.96        | 0.99           | 0.99       | 0.97       | 0.89       | 0.45       | 0.45       |
|                                 | 0.01           | 0.01        | 0.01        | 0.01        | 0.03        | 0.02        | 0.00           | 0.00       | 0.01       | 0.06       | 0.47       | 0.47       |
| <b>Overall Mean</b>             | 0.95           | 0.95        | 0.95        | 0.92        | 0.91        | 0.91        | 0.94           | 0.93       | 0.93       | 0.92       | 0.58       | 0.63       |
| <b>Standard deviations</b>      | 0.07           | 0.03        | 0.07        | 0.12        | 0.08        | 0.06        | 0.11           | 0.17       | 0.14       | 0.13       | 0.23       | 0.24       |
| <b>Coefficient of variation</b> | 0.08           | 0.03        | 0.07        | 0.13        | 0.09        | 0.07        | 0.12           | 0.18       | 0.15       | 0.14       | 0.40       | 0.38       |

TABLE 4 Nei's diversity for 12 quantitative traits of *Parastagonospora nodorum*.

| Population          | Nei's Diversity | Growth Rate 24°C (control) | Growth Rate 18°C | Growth Rate 30°C | Growth Rate 0.1 ppm | Growth Rate 0.5 ppm | Growth Rate 1 ppm | Grey Value 24°C (control) | Grey Value 18°C | Grey Value 30°C | Grey Value 0.1 ppm | Grey Value 0.5 ppm | Grey Value 1 ppm |
|---------------------|-----------------|----------------------------|------------------|------------------|---------------------|---------------------|-------------------|---------------------------|-----------------|-----------------|--------------------|--------------------|------------------|
| Australia           | 0.091E*         | 4.37B                      | 3.63B            | 2.48A            | 2.57CDE             | 0.96C               | 0.59C             | 70.40C                    | 81.73B          | 51.40C          | 66.01BC            | 50.88C             | 56.79B           |
| South Africa        | 0.095DE         | 4.86AB                     | 3.94AB           | 1.93B            | 2.52DE              | 1.01C               | 0.58C             | 80.64ABC                  | 89.87AB         | 59.43ABC        | 82.19AB            | 71.85ABC           | 85.30A           |
| Switzerland A       | 0.120B          | 5.26A                      | 4.26A            | 2.52A            | 4.33A               | 2.66B               | 1.88B             | 79.74BC                   | 89.40AB         | 57.98BC         | 85.01AB            | 72.11AB            | 67.78AB          |
| Switzerland B       | 0.121B          | 5.11A                      | 4.20A            | 2.56A            | 4.66A               | 3.27A               | 2.38A             | 71.81C                    | 82.28B          | 50.57C          | 73.35ABC           | 64.19ABC           | 59.88B           |
| Iran                | 0.131A          | 5.37A                      | 4.28A            | 2.62A            | 2.97BC              | 1.09C               | 0.65C             | 94.56AB                   | 100.05A         | 77.31A          | 75.29ABC           | 69.38ABC           | 64.42AB          |
| New York            | 0.100CD         | 5.25A                      | 4.37A            | 2.49A            | 2.83BCD             | 0.86C               | 0.51C             | 93.37AB                   | 103.55A         | 72.63AB         | 84.46AB            | 73.26AB            | 74.82AB          |
| Oregon              | 0.105C          | 5.11A                      | 4.19A            | 2.57A            | 2.38E               | 0.65C               | 0.48C             | 97.43A                    | 97.86AB         | 74.11AB         | 90.80A             | 77.70A             | 75.04AB          |
| Texas               | 0.102C          | 5.17A                      | 4.20A            | 2.70A            | 3.12B               | 0.97C               | 0.53C             | 69.79C                    | 82.21B          | 47.24C          | 56.96C             | 51.95BC            | 60.61B           |
| Overall Mean        | 0.11            | 5.06                       | 4.13             | 2.48             | 3.17                | 1.44                | 0.95              | 82.22                     | 90.87           | 61.33           | 76.76              | 66.42              | 68.08            |
| Standard deviations | 0.01            | 0.32                       | 0.24             | 0.24             | 0.86                | 0.97                | 0.74              | 11.46                     | 8.70            | 11.80           | 11.18              | 10.00              | 9.67             |

\*Values followed by different letters in the same column are significantly different at  $P \leq 0.05$ .

TABLE 5 Estimated pairwise  $F_{ST}$  according to Nei (1987) based on 49429 neutral SNPs from 164 isolates of *Parastagonospora nodorum*. Significance thresholds based on 20000 *bootstraps*: \* $P < 0.01$ , \*\*Nonsignificant  $P \leq 0.05$ .

|               | Australia | South Africa | Switzerland A | Switzerland B | Iran | New York | Oregon | Texas |
|---------------|-----------|--------------|---------------|---------------|------|----------|--------|-------|
| Australia     |           | 0.16         | 0.13          | 0.12          | 0.24 | 0.17     | 0.15   | 0.18  |
| South Africa  | *         |              | 0.15          | 0.15          | 0.22 | 0.20     | 0.19   | 0.20  |
| Switzerland A | *         | *            |               | 0.00          | 0.15 | 0.08     | 0.06   | 0.08  |
| Switzerland B | *         | *            | **NS          |               | 0.15 | 0.08     | 0.06   | 0.08  |
| Iran          | *         | *            | *             | *             |      | 0.20     | 0.20   | 0.20  |
| New York      | *         | *            | *             | *             | *    |          | 0.08   | 0.04  |
| Oregon        | *         | *            | *             | *             | *    | *        |        | 0.08  |
| Texas         | *         | *            | *             | *             | *    | *        | *      |       |

## References

- Alizon, S., Hurford, A., Mideo, N., Baalen, M.V., 2009. Virulence evolution and the trade-off hypothesis: history, current state of affairs and the future. *Journal of Evolutionary Biology* 22, 245–259. <https://doi.org/10.1111/j.1420-9101.2008.01658.x>
- Angilletta, M., Oufiero, C.E., Leaché, A.D., 2006. Direct and Indirect Effects of Environmental Temperature on the Evolution of Reproductive Strategies: An Information-Theoretic Approach. *The American Naturalist* 168, E123–E135. <https://doi.org/10.1086/507880>
- Bates, D., Mächler, M., Bolker, B., Walker, S., 2015. Fitting Linear Mixed-Effects Models Using lme4. *J. Stat. Soft.* 67. <https://doi.org/10.18637/jss.v067.i01>
- Blixt, E., Olson, Å., Lindahl, B., Djurlle, A., Yuen, J., 2010. Spatiotemporal variation in the fungal community associated with wheat leaves showing symptoms similar to stagonospora nodorum blotch. *European Journal of Plant Pathology* 126, 373–386. <https://doi.org/10.1007/s10658-009-9542-z>
- Bolger, A., Lohse, M., Usadel, B., 2014. Trimmomatic: a flexible trimmer for Illumina sequence data. *Bioinformatics* 30. <https://doi.org/10.1093/bioinformatics/btu170>
- Boots, M., Hudson, P.J., Sasaki, A., 2004. Large Shifts in Pathogen Virulence Relate to Host Population Structure. *Science* 303, 842–844. <https://doi.org/10.1126/science.1088542>
- Bridelli, M.G., Ciati, A., Crippa, P.R., 2006. Binding of chemicals to melanins re-examined: Adsorption of some drugs to the surface of melanin particles. *Biophysical Chemistry* 119, 137–145. <https://doi.org/10.1016/j.bpc.2005.06.004>
- Brunner, P.C., Stefanato, F.L., McDonald, B.A., 2008. Evolution of the *CYP51* gene in *Mycosphaerella graminicola*: evidence for intragenic recombination and selective replacement. *Molecular Plant Pathology* 9, 305–316. <https://doi.org/10.1111/j.1364-3703.2007.00464.x>

- Butler, M., Day, A., 1998. Fungal melanins: a review. *Canadian Journal of Microbiology* 44, 1115–1136. <https://doi.org/10.1139/w98-119>
- Calvo, A.M., Wilson, R.A., Bok, J., Keller, N.P., 2002. Relationship between Secondary Metabolism and Fungal Development. *Microbiology and Molecular Biology Reviews* 66, 447–459. <https://doi.org/10.1128/mubr.66.3.447-459.2002>
- Chang, C.C., Chow, C.C., Tellier, L., Vattikuti, S., Purcell, S.M., Lee, J.J., 2015. Second-generation PLINK: rising to the challenge of larger and richer datasets. *GigaScience* 4, 1–16. <https://doi.org/10.1186/s13742-015-0047-8>
- Chevin, L.-M., Lande, R., Mace, G.M., 2010. Adaptation, Plasticity, and Extinction in a Changing Environment: Towards a Predictive Theory. *PLoS Biology* 8, e1000357. <https://doi.org/10.1371/journal.pbio.1000357>
- Choi, Y.-E., Goodwin, S.B., 2011. Gene encoding a c-type cyclin in *Mycosphaerella graminicola* is involved in aerial mycelium formation, filamentous growth, hyphal swelling, melanin biosynthesis, stress response, and pathogenicity. *Molecular plant-microbe interactions : MPMI* 24, 469–77. <https://doi.org/10.1094/mpmi-04-10-0090>
- Chumley, F.G., Valent, B., 1990. Genetic Analysis of Melanin-Deficient, Nonpathogenic Mutants of *Magnaporthe grisea*. *Molecular Plant-Microbe Interactions* 3, 135. <https://doi.org/10.1094/mpmi-3-135>
- Cooper, B.S., Tharp, J.M., Jernberg, I.I., Angilletta, M.J., 2012. Developmental plasticity of thermal tolerances in temperate and subtropical populations of *Drosophila melanogaster*. *Journal of Thermal Biology* 37, 211–216. <https://doi.org/10.1016/j.jtherbio.2012.01.001>
- Cordero, R.J.B., Casadevall, A., 2017. Functions of fungal melanin beyond virulence. *Fungal Biology Reviews* 31, 99–112. <https://doi.org/10.1016/j.fbr.2016.12.003>

Corredor-Moreno, P., Saunders, D.G.O., 2019. Expecting the unexpected: factors influencing the emergence of fungal and oomycete plant pathogens. *New Phytologist*.

<https://doi.org/10.1111/nph.16007>

Dadachova, E., Bryan, R.A., Huang, X., Moadel, T., Schweitzer, A.D., Aisen, P., Nosanchuk, J.D., Casadevall, A., 2007. Ionizing Radiation Changes the Electronic Properties of Melanin and Enhances the Growth of Melanized Fungi. *PLoS ONE* 2, e457.

<https://doi.org/10.1371/journal.pone.0000457>

Dadachova, E., Casadevall, A., 2008. Ionizing radiation: how fungi cope, adapt, and exploit with the help of melanin. *Current Opinion in Microbiology* 11, 525–531.

<https://doi.org/10.1016/j.mib.2008.09.013>

Danecek, P., Auton, A., Abecasis, G., Albers, C.A., Banks, E., DePristo, M.A., Handsaker, R.E., Lunter, G., Marth, G.T., Sherry, S.T., McVean, G., Durbin, R., Group, 1000, 2011. The variant call format and VCFtools. *Bioinformatics* 27, 2156–2158.

<https://doi.org/10.1093/bioinformatics/btr330>

Eisenman, H.C., Casadevall, A., 2012. Synthesis and assembly of fungal melanin. *Applied Microbiology and Biotechnology* 93, 931–940. <https://doi.org/10.1007/s00253-011-3777-2>

Elder, B.D., Reilly, J.R., 2014. Warmer temperatures increase disease transmission and outbreak intensity in a host–pathogen system. *Journal of Animal Ecology* 83, 838–849. <https://doi.org/10.1111/1365-2656.12180>

Falconer, D.S., Mackay, T.F., 1996. *Introduction to quantitative genetics*. Longman.

Ficke, A., Cowger, C., Bergstrom, G.C., Brodal, G., 2017. Understanding yield loss and pathogen biology to improve disease management: *Septoria nodorum* blotch - a case study in wheat. *Plant Disease*. <https://doi.org/10.1094/pdis-09-17-1375-fe>



- Fisher, M.C., Henk, Daniel.A., Briggs, C.J., Brownstein, J.S., Madoff, L.C., McCraw, S.L., Gurr, S.J., 2012. Emerging fungal threats to animal, plant and ecosystem health. *Nature* 484, 186. <https://doi.org/10.1038/nature10947>
- Fones, H., Gurr, S., 2015. The impact of *Septoria tritici* Blotch disease on wheat: An EU perspective. *Fungal Genetics and Biology* 79, 3–7. <https://doi.org/10.1016/j.fgb.2015.04.004>
- Fox, J., 2005. The *R* Commander: A Basic-Statistics Graphical User Interface to *R*. *J. Stat. Soft.* 14. <https://doi.org/10.18637/jss.v014.i09>
- Gilbert, J., Woods, S.M., 2001. Leaf spot diseases of spring wheat in southern Manitoba farm fields under conventional and conservation tillage. *Canadian Journal of Plant Science* 81, 551–559. <https://doi.org/10.4141/p00-088>
- Goudet, J., 2005. hierfstat, a package for r to compute and test hierarchical F-statistics. *Mol Ecol Notes* 5, 184–186. <https://doi.org/10.1111/j.1471-8286.2004.00828.x>
- Hagiwara, D., Sakai, K., Suzuki, S., Umemura, M., Nogawa, T., Kato, N., Osada, H., Watanabe, A., Kawamoto, S., Gono, T., Kamei, K., 2017. Temperature during conidiation affects stress tolerance, pigmentation, and tryptacidin accumulation in the conidia of the airborne pathogen *Aspergillus fumigatus*. *PLOS ONE* 12, e0177050. <https://doi.org/10.1371/journal.pone.0177050>
- Hayden, E.J., Bratulic, S., Koenig, I., Ferrada, E., Wagner, A., 2014. The Effects of Stabilizing and Directional Selection on Phenotypic and Genotypic Variation in a Population of RNA Enzymes. *Journal of Molecular Evolution* 78, 101–108. <https://doi.org/10.1007/s00239-013-9604-x>
- Hovmoller, M., Yahyaoui, A., Milus, E., Justesen, A., 2008. Rapid global spread of two aggressive strains of a wheat rust fungus. *Molecular Ecology* 17, 3818–3826. <https://doi.org/10.1111/j.1365-294x.2008.03886.x>

- Knies, J.L., Kingsolver, J.G., 2010. Erroneous Arrhenius: Modified Arrhenius Model Best Explains the Temperature Dependence of Ectotherm Fitness. *The American Naturalist* 176, 227–233. <https://doi.org/10.1086/653662>
- Knorr, K., Jørgensen, L.N., Nicolaisen, M., 2019. Fungicides have complex effects on the wheat phyllosphere mycobiome. *PLOS ONE* 14, e0213176. <https://doi.org/10.1371/journal.pone.0213176>
- Krishnan, P., Meile, L., Plissonneau, C., Ma, X., Hartmann, F., Croll, D., McDonald, B., Sánchez-Vallet, A., 2018. Transposable element insertions shape gene regulation and melanin production in a fungal pathogen of wheat. *BMC Biology*. <https://doi.org/10.1186/s12915-018-0543-2>
- Laine, A., 2008. Temperature-mediated patterns of local adaptation in a natural plant–pathogen metapopulation. *Ecology Letters* 11, 327–337. <https://doi.org/10.1111/j.1461-0248.2007.01146.x>
- Langmead, B., Salzberg, S., 2012. Fast gapped-read alignment with Bowtie 2. *Nature Methods* 9. <https://doi.org/10.1038/nmeth.1923>
- Leinonen, T., McCairns, R.J.S., O’Hara, R.B., Merilä, J., 2013. QST–FST comparisons: evolutionary and ecological insights from genomic heterogeneity. *Nature Reviews Genetics* 14, 179. <https://doi.org/10.1038/nrg3395>
- Leinonen, T., O’Hara, R., Cano, J., Merilä, J., 2008. Comparative studies of quantitative trait and neutral marker divergence: a meta-analysis. *Journal of Evolutionary Biology* 21, 1–17. <https://doi.org/10.1111/j.1420-9101.2007.01445.x>
- Lendenmann, M.H., Croll, D., McDonald, B.A., 2015. QTL mapping of fungicide sensitivity reveals novel genes and pleiotropy with melanization in the pathogen *Zymoseptoria tritici*. *Fungal Genetics and Biology* 80, 53–67. <https://doi.org/10.1016/j.fgb.2015.05.001>

- Lendenmann, M.H., Croll, D., Stewart, E.L., McDonald, B.A., 2014. Quantitative Trait Locus Mapping of Melanization in the Plant Pathogenic Fungus *Zymoseptoria tritici*. *G3: Genes|Genomes|Genetics* 4. <https://doi.org/10.1534/g3.114.015289>
- McDonald, B.A., Stukenbrock, E.H., 2016. Rapid emergence of pathogens in agro-ecosystems: global threats to agricultural sustainability and food security. *Philosophical Transactions of the Royal Society B: Biological Sciences* 371, 20160026. <https://doi.org/10.1098/rstb.2016.0026>
- McDonald, M.C., Oliver, R.P., Friesen, T.L., Brunner, P.C., McDonald, B.A., 2013. Global diversity and distribution of three necrotrophic effectors in *Phaeosphaeria nodorum* and related species. *New Phytologist* 199, 241–251. <https://doi.org/10.1111/nph.12257>
- McDonald, M.C., Razavi, M., Friesen, T.L., Brunner, P.C., McDonald, B.A., 2012. Phylogenetic and population genetic analyses of *Phaeosphaeria nodorum* and its close relatives indicate cryptic species and an origin in the Fertile Crescent. *Fungal Genetics and Biology* 49. <https://doi.org/10.1016/j.fgb.2012.08.001>
- McDonald, M.C., Renkin, M., Spackman, M., Orchard, B., Croll, D., Solomon, P.S., Milgate, A., 2018. Rapid parallel evolution of azole fungicide resistance in Australian populations of the wheat pathogen *Zymoseptoria tritici*. *Applied and Environmental Microbiology*. <https://doi.org/10.1128/AEM.01908-18>
- McKenna, A., Hanna, M., Banks, E., Sivachenko, A., Cibulskis, K., Kernytsky, A., Garimella, K., Altshuler, D., Gabriel, S., Daly, M., DePristo, M., 2010. The Genome Analysis Toolkit: A MapReduce framework for analyzing next-generation DNA sequencing data. *Genome Research* 20. <https://doi.org/10.1101/gr.107524.110>

- Merilä, J., Crnokrak, P., 2001. Comparison of genetic differentiation at marker loci and quantitative traits. *Journal of Evolutionary Biology* 14, 892–903.  
<https://doi.org/10.1046/j.1420-9101.2001.00348.x>
- Milus, E.A., Kristensen, K., Hovmøller, M.S., 2009. Evidence for Increased Aggressiveness in a Recent Widespread Strain of *Puccinia striiformis* f. sp. *tritici* Causing Stripe Rust of Wheat. *Phytopathology* 99, 89–94. <https://doi.org/10.1094/phyto-99-1-0089>
- Murray, G., Brennan, J., 2009. Estimating disease losses to the Australian wheat industry. *Australasian Plant Pathology* 38. <https://doi.org/10.1071/AP09053>
- Nosanchuk, J.D., Casadevall, A., 2006. Impact of Melanin on Microbial Virulence and Clinical Resistance to Antimicrobial Compounds. *Antimicrobial Agents and Chemotherapy* 50, 3519–3528. <https://doi.org/10.1128/aac.00545-06>
- Nosanchuk, J.D., Casadevall, A., 2003. The contribution of melanin to microbial pathogenesis. *Cellular Microbiology* 5, 203–223. <https://doi.org/10.1046/j.1462-5814.2003.00268.x>
- Oliver, R., Friesen, T., Faris, J., Solomon, P., 2012. *Stagonospora nodorum*: From Pathology to Genomics and Host Resistance. *Annual review of phytopathology* 50, 23–43.  
<https://doi.org/10.1146/annurev-phyto-081211-173019>
- Paolo, W.F., Dadachova, E., Mandal, P., Casadevall, A., Szaniszlo, P.J., Nosanchuk, J.D., 2006. Effects of disrupting the polyketide synthase gene WdPKS1 in *Wangiella* [Exophiala] *dermatitidis* on melanin production and resistance to killing by antifungal compounds, enzymatic degradation, and extremes in temperature. *BMC Microbiology* 6, 55. <https://doi.org/10.1186/1471-2180-6-55>
- Pereira, D.A., McDonald, B.A., Brunner, P.C., 2017. Mutations in the *CYP51* gene reduce DMI sensitivity in *Parastagonospora nodorum* populations in Europe and China. *Pest Management Science* 73. <https://doi.org/10.1002/ps.4486>

- Pereira, D.A.S., Ceresini, P., Castroagudín, V.L., Molina, L.M.R., Mesa, E.C., Negrisoli, M.M., Campos, S.N., Pegolo, M.E. de S., Takada, H.M., 2016. Population genetic structure of *Rhizoctonia oryzae-sativae* from rice in Latin America and its adaptive potential to emerge as pathogen on Urochloa pastures. *Phytopathology* 107, 121–131. <https://doi.org/10.1094/phyto-05-16-0219-r>
- Pfeifer, B., Wittelsbürger, U., Ramos-Onsins, S.E., Lercher, M.J., 2014. PopGenome: An Efficient Swiss Army Knife for Population Genomic Analyses in R. *Molecular Biology and Evolution* 31, 1929–1936. <https://doi.org/10.1093/molbev/msu136>
- Price, C.L., Parker, J.E., Warrilow, A.G., Kelly, D.E., Kelly, S.L., 2015. Azole fungicides – understanding resistance mechanisms in agricultural fungal pathogens. *Pest Management Science* 71, 1054–1058. <https://doi.org/10.1002/ps.4029>
- Qin, C.-F., He, M.-H., Chen, F.-P., Zhu, W., Yang, L.-N., Wu, E.-J., Guo, Z.-L., Shang, L.-P., Zhan, J., 2016. Comparative analyses of fungicide sensitivity and SSR marker variations indicate a low risk of developing azoxystrobin resistance in *Phytophthora infestans*. *Scientific Reports* 6, 20483. <https://doi.org/10.1038/srep20483>
- Quaedvlieg, W., Verkley, G.J.M., Shin, H.-D., Barreto, R.W., Alfenas, A.C., Swart, W.J., Groenewald, J.Z., Crous, P.W., 2013. Sizing up Septoria. *Studies in Mycology* 75, 307–390. <https://doi.org/10.3114/sim0017>
- R Core Team, 2019. R: A Language and Environment for Statistical Computing. R Foundation for Statistical Computing, Vienna, Austria.
- Rehnstrom, A.L., Free, S.J., 1996. The isolation and characterization of melanin-deficient mutants of *Monilinia fructicola*. *Physiological and Molecular Plant Pathology* 49, 321–330. <https://doi.org/10.1006/pmpp.1996.0057>
- Richards, J.K., Wyatt, N.A., Liu, Z., Faris, J.D., Friesen, T.L., 2017. Reference Quality Genome Assemblies of Three *Parastagonospora nodorum* Isolates Differing in

Virulence on Wheat. G3: Genes, Genomes, Genetics 8, g3.300462.2017.

<https://doi.org/10.1534/g3.117.300462>

Sanjak, J.S., Sidorenko, J., Robinson, M.R., Thornton, K.R., Visscher, P.M., 2018. Evidence of directional and stabilizing selection in contemporary humans. Proceedings of the National Academy of Sciences 115, 151–156.

<https://doi.org/10.1073/pnas.1707227114>

Savary, S., Willocquet, L., Pethybridge, S., Esker, P., McRoberts, N., Nelson, A., 2019. The global burden of pathogens and pests on major food crops. Nature Ecology & Evolution 3, 430–439. <https://doi.org/10.1038/s41559-018-0793-y>

Shaw, M., Bearchell, S., Fitt, B., Fraaije, B., 2008. Long-term relationships between environment and abundance in wheat of *Phaeosphaeria nodorum* and *Mycosphaerella graminicola*. New Phytologist 177, 229–238. <https://doi.org/10.1111/j.1469-8137.2007.02236.x>

Singaravelan, N., Grishkan, I., Beharav, A., Wakamatsu, K., Ito, S., Nevo, E., 2008. Adaptive Melanin Response of the Soil Fungus *Aspergillus niger* to UV Radiation Stress at “Evolution Canyon”, Mount Carmel, Israel. PLoS ONE 3, e2993.

<https://doi.org/10.1371/journal.pone.0002993>

Sommerhalder, R.J., McDonald, B.A., Zhan, J., 2006. The Frequencies and Spatial Distribution of Mating Types in *Stagonospora nodorum* Are Consistent with Recurring Sexual Reproduction. Phytopathology 96, 234–239.

<https://doi.org/10.1094/PHYTO-96-0234>

Spitze, K., 1993. Population structure in *Daphnia obtusa*: quantitative genetic and allozymic variation. Genetics 135, 367–74.

- Stefansson, T., Willi, Y., Croll, D., McDonald, 2014. An assay for quantitative virulence in *Rhynchosporium commune* reveals an association between effector genotype and virulence. *Plant Pathology* 63, 405–414. <https://doi.org/10.1111/ppa.12111>
- Stefansson, T.S., McDonald, B.A., Willi, Y., 2013. Local adaptation and evolutionary potential along a temperature gradient in the fungal pathogen *Rhynchosporium commune*. *Evolutionary Applications* 6, 524–534. <https://doi.org/10.1111/eva.12039>
- Stukenbrock, E.H., Banke, S., McDonald, B.A., 2006. Global migration patterns in the fungal wheat pathogen *Phaeosphaeria nodorum*. *Molecular Ecology* 15, 2895–2904. <https://doi.org/10.1111/j.1365-294x.2006.02986.x>
- Stukenbrock, E.H., McDonald, B.A., 2008. The Origins of Plant Pathogens in Agro-Ecosystems. *Annual Review of Phytopathology* 46, 75–100. <https://doi.org/10.1146/annurev.phyto.010708.154114>
- Sturm, R.A., Duffy, D.L., 2012. Human pigmentation genes under environmental selection. *Genome Biology* 13, 248. <https://doi.org/10.1186/gb-2012-13-9-248>
- Tonsor, S.J., Elnaccash, T.W., Scheiner, S.M., 2013. Developmental instability is genetically correlated with phenotypic plasticity, constraining heritability, and fitness. *Evolution* 67, 2923–2935. <https://doi.org/10.1111/evo.12175>
- Wheeler, M.H., Bell, A.A., 1988. Melanins and Their Importance in Pathogenic Fungi, in: Springer New York. pp. 338–387. [https://doi.org/10.1007/978-1-4612-3730-3\\_10](https://doi.org/10.1007/978-1-4612-3730-3_10)
- Whitlock, M.C., 2008. Evolutionary inference from QST. *Molecular Ecology* 17, 1885–1896. <https://doi.org/10.1111/j.1365-294X.2008.03712.x>
- Wickham, H., 2009. *Ggplot2: Elegant Graphics for Data Analysis*, 2nd ed. Springer Publishing Company, Incorporated.

- Willi, Y., Frank, A., Heinzelmann, R., Kälin, A., Spalinger, L., Ceresini, P.C., 2011. The adaptive potential of a plant pathogenic fungus, *Rhizoctonia solani* AG-3, under heat and fungicide stress. *Genetica* 139, 903. <https://doi.org/10.1007/s10709-011-9594-9>
- Yampolsky, L., Schaer, T., Ebert, D., 2013. Adaptive phenotypic plasticity and local adaptation for temperature tolerance in freshwater zooplankton. *Proceedings of the Royal Society B: Biological Sciences* 281, 20132744–20132744. <https://doi.org/10.1098/rspb.2013.2744>
- Yang, L., Zhu, W., Wu, E., Yang, C., Thrall, P.H., Burdon, J.J., Jin, L., Shang, L., Zhan, J., 2016. Trade-offs and evolution of thermal adaptation in the Irish potato famine pathogen *Phytophthora infestans*. *Molecular Ecology* 25, 4047–4058. <https://doi.org/10.1111/mec.13727>
- Zearfoss, A., Cowger, C., Ojiambo, P., 2011. A Degree-Day Model for the Latent Period of *Stagonospora nodorum* Blotch in Winter Wheat. *Plant Disease* 95, 561–567. <https://doi.org/10.1094/pdis-09-10-0651>
- Zhan, J., Linde, C.C., Jürgens, T., Merz, U., Steinebrunner, F., McDonald, B.A., 2005. Variation for neutral markers is correlated with variation for quantitative traits in the plant pathogenic fungus *Mycosphaerella graminicola*. *Molecular Ecology* 14, 2683–2693. <https://doi.org/10.1111/j.1365-294x.2005.02638.x>
- Zhan, J., McDonald, B., 2011. Thermal adaptation in the fungal pathogen *Mycosphaerella graminicola*. *Molecular Ecology* 20. <https://doi.org/10.1111/j.1365-294X.2011.05023.x>
- Zhu, W., Zhan, J., McDonald, B.A., 2018. Evidence for local adaptation and pleiotropic effects associated with melanization in a plant pathogenic fungus. *Fungal Genetics and Biology*. <https://doi.org/10.1016/j.fgb.2018.04.002>





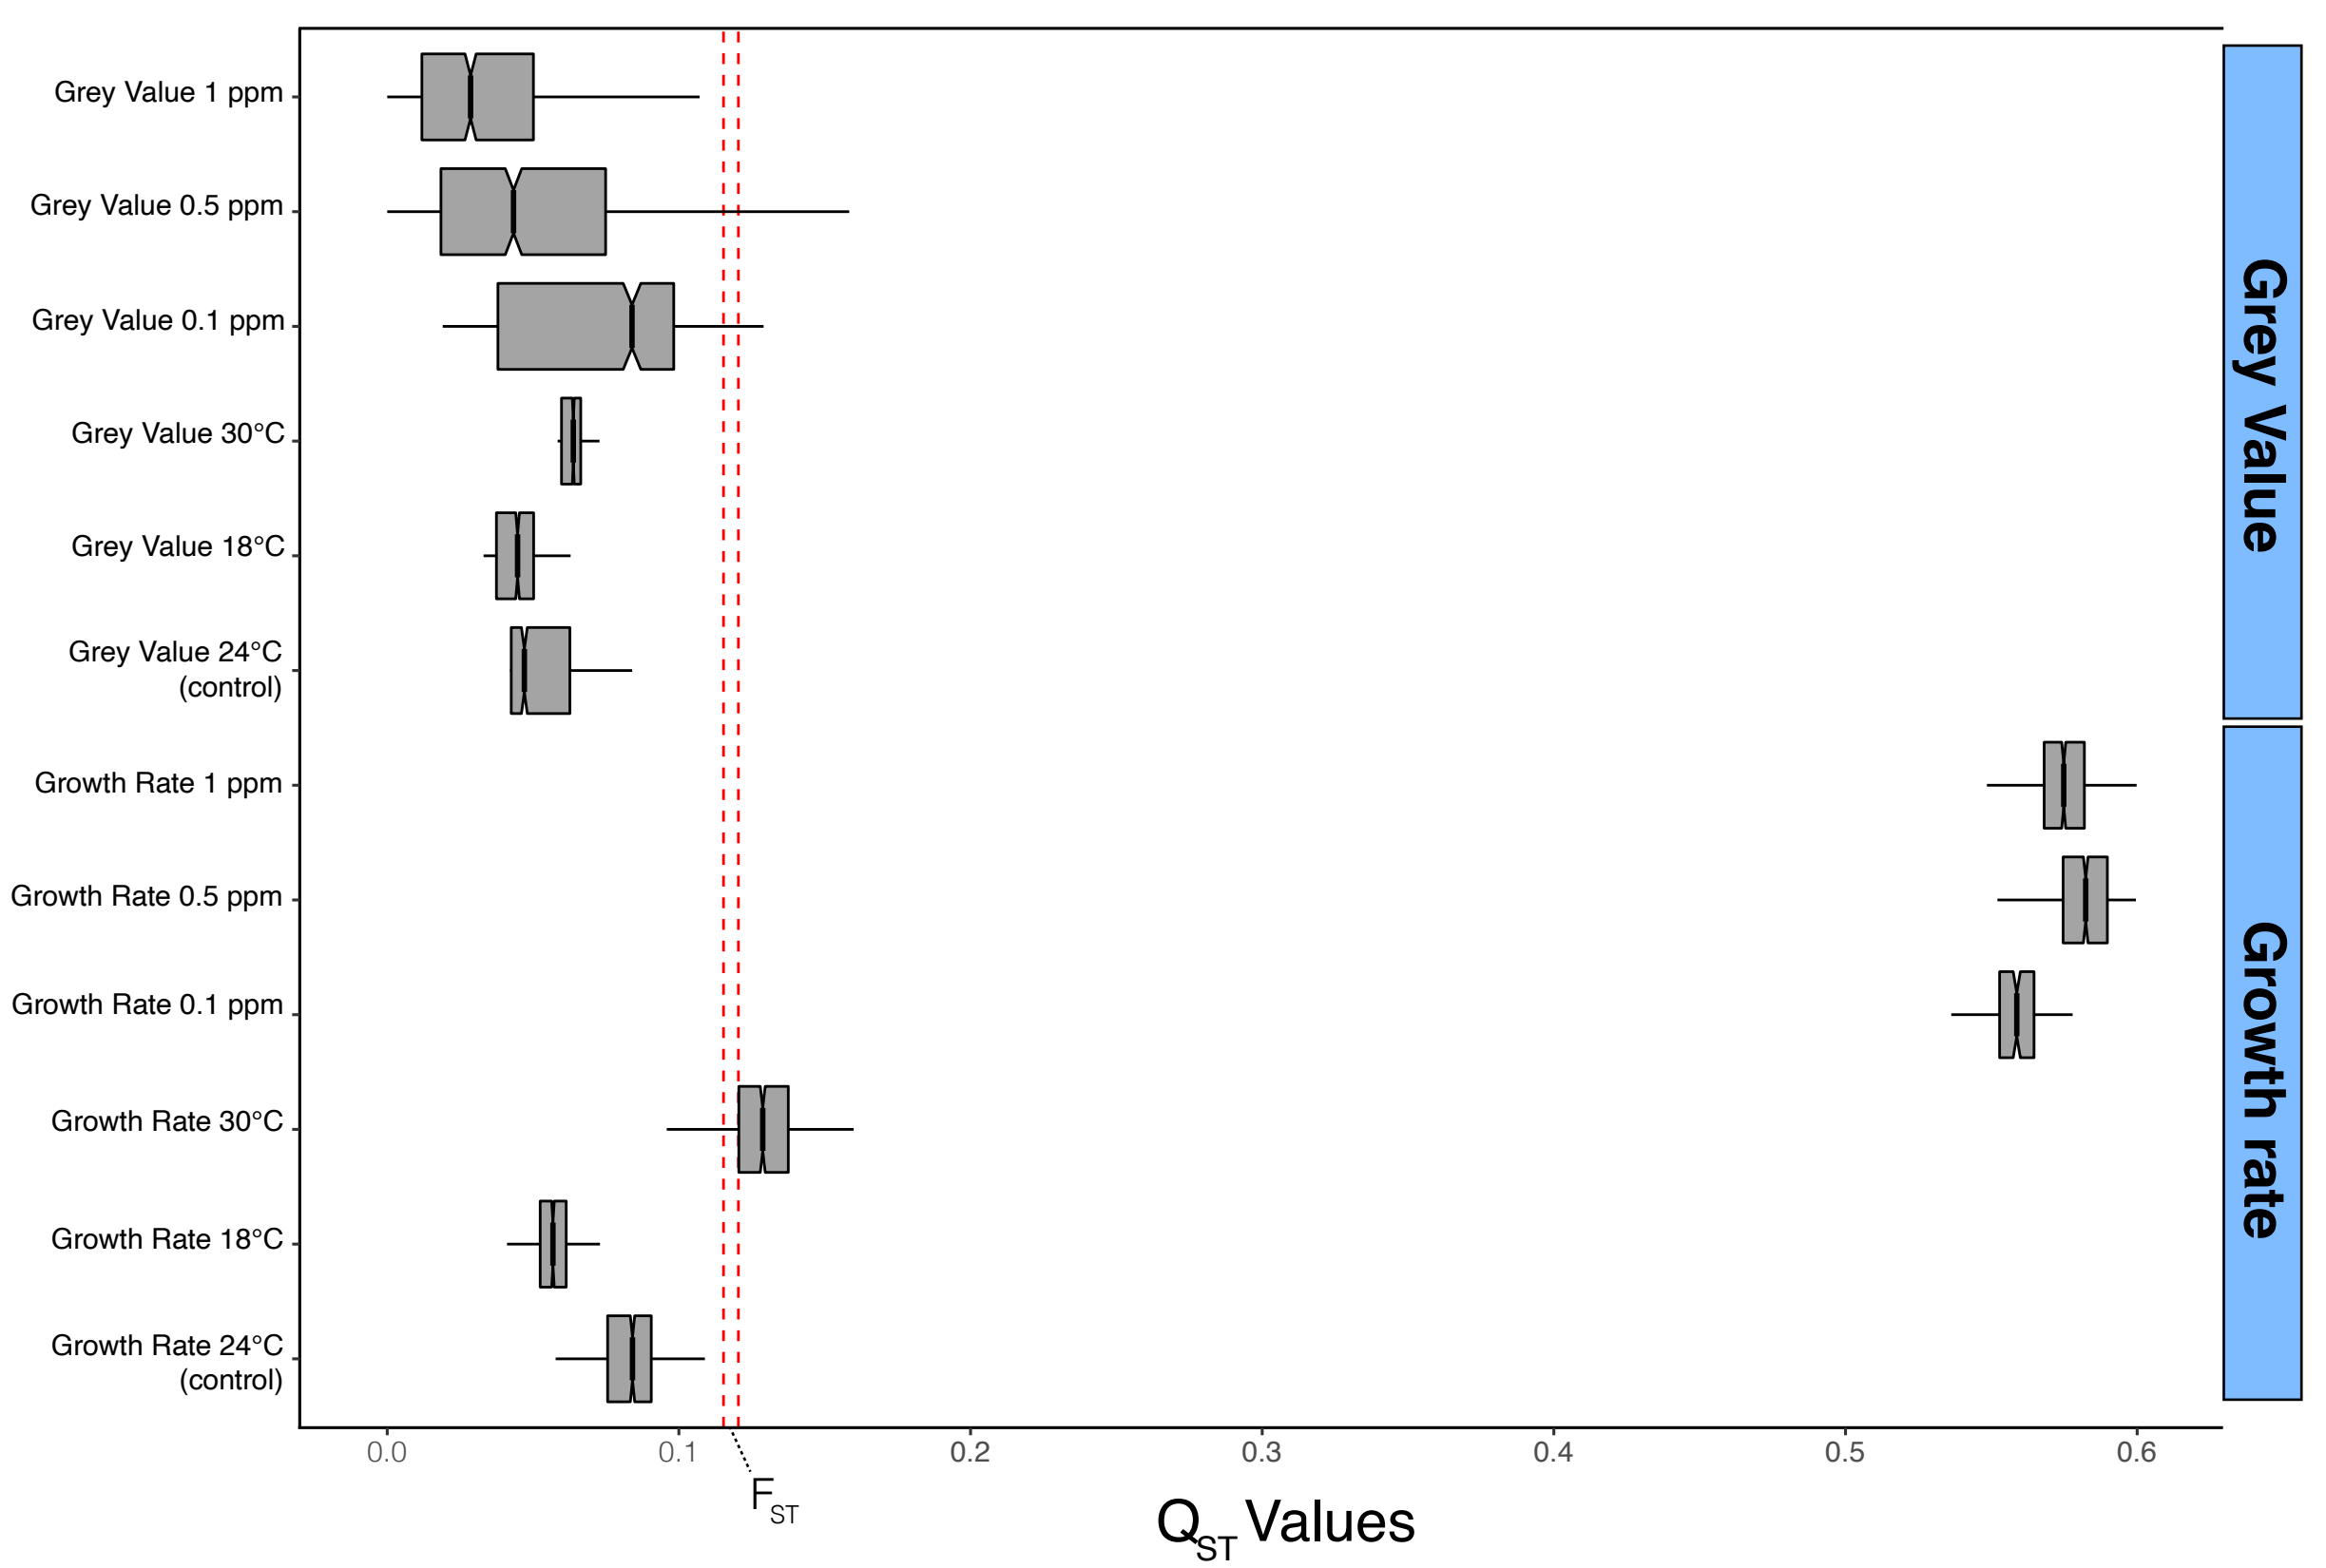



**A**

### Fungicide Concentrations

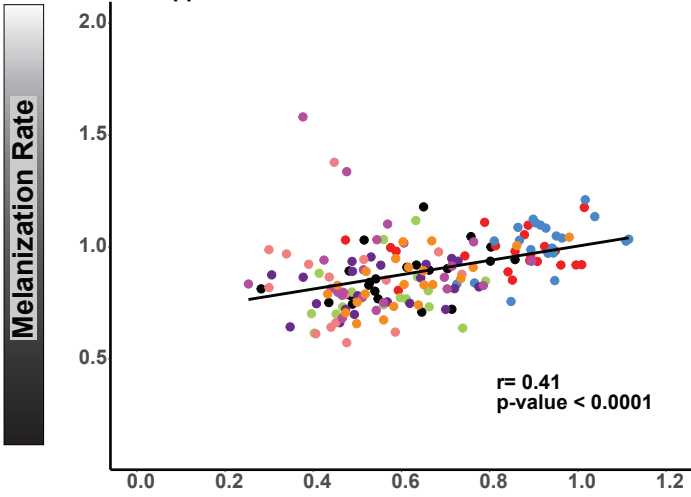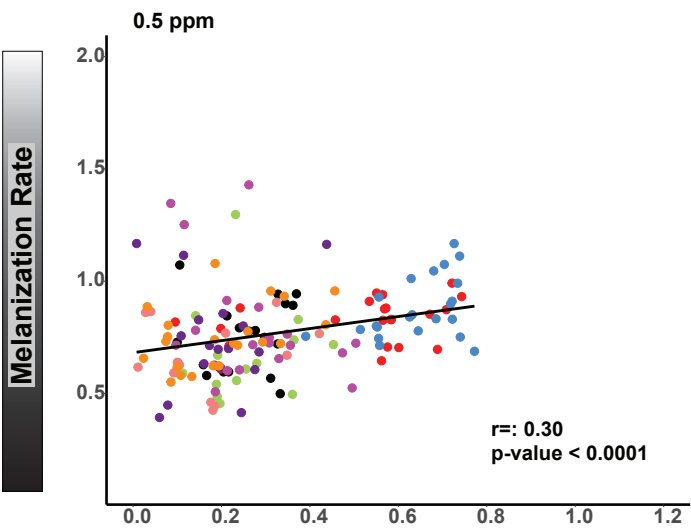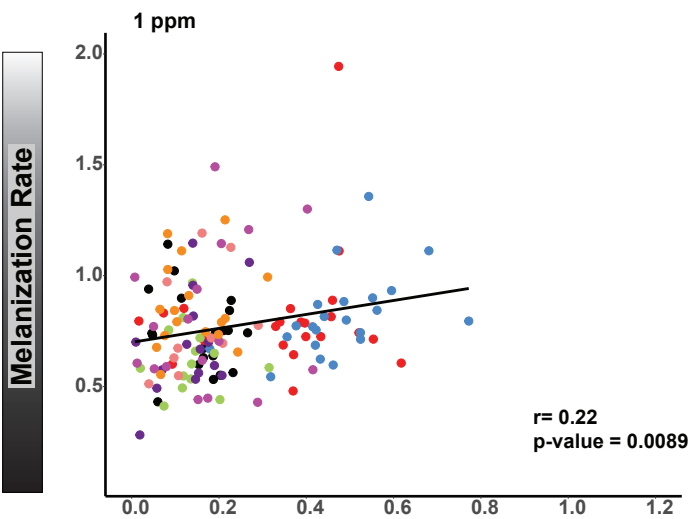

Fungicide Resistance

**B**

### Temperatures

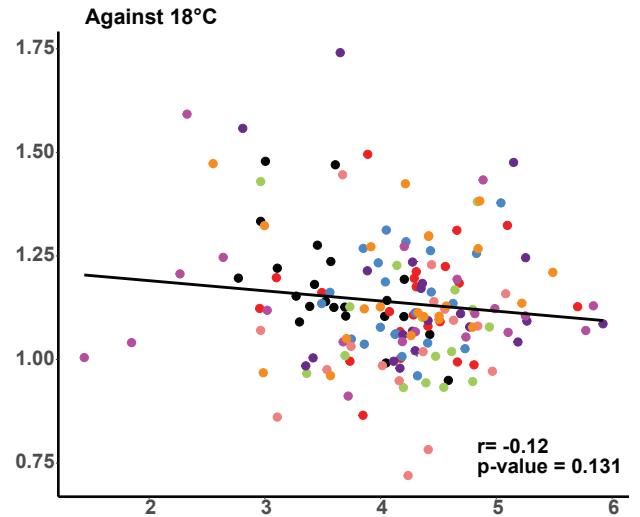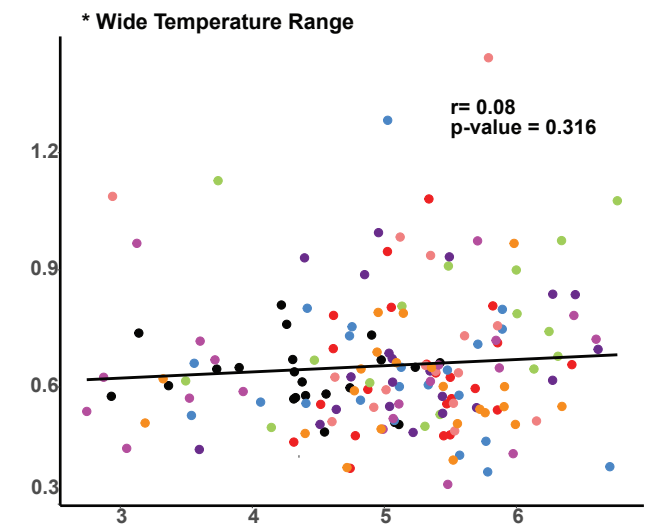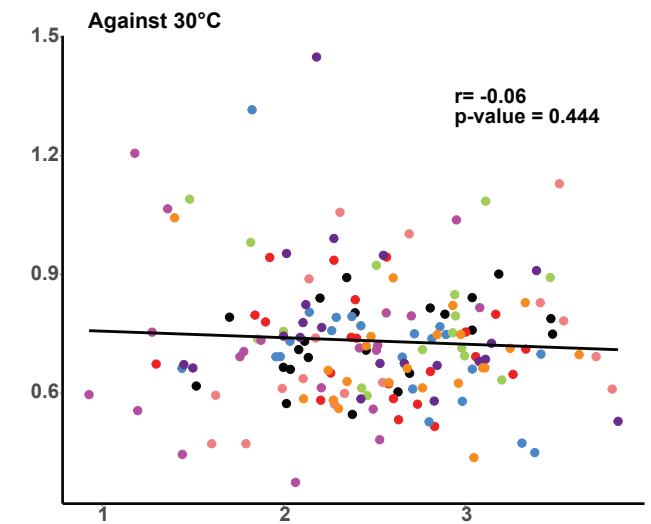

Growth Rate (mm/day)

### Population

- Australia (2001)
- South Africa (1995)
- Switzerland (1999A)
- Switzerland (1999B)
- Iran (2005/2010)
- New York (1991)
- Oregon (1993)
- Texas (1991)
